# Supplementary material for: High performance broadband photoelectrochemical photodetectors based on Cu-doped Bi 2 O 2 Se nanosheets
Source: Royal Society of Chemistry journal article supplement (doi:10.1039/d5nr04124d), 2026-01-01
Supplement: d5nr04124d1.pdf [file d5nr04124d1.pdf]

## Supporting Information

### **High Performance Broadband Photoelectrochemical Photodetectors Based on Cu-doped Bi<sub>2</sub>O<sub>2</sub>Se Nanosheets**

Xinyu Guo, Yaning Hu, Jiaying Wang, Ziyang Zhou, Peijie Ma\*, Kun Zheng

State Key Laboratory of Materials Low-Carbon Recycling, Beijing University of  
Technology, Beijing 100124, China.

During the synthesis, there were four potential chemical reactions:

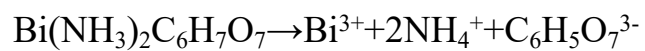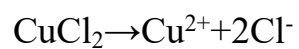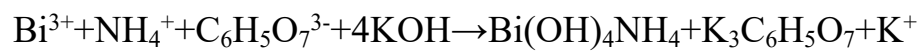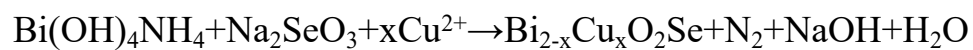

**Table S1** The power intensities of various wavelengths of light

| <div>P(Mw/cm<sup>2</sup>)<br/>Light(nm)</div> | I    | II   | III   | IV    |
|-----------------------------------------------|------|------|-------|-------|
| 365                                           | 1.3  | 3.39 | 5.78  | 10.68 |
| 400                                           | 1.55 | 3.08 | 5.77  | 8.68  |
| 500                                           | 3.64 | 5.04 | 10.8  | 13.87 |
| 600                                           | 3.2  | 5.92 | 8.58  | 14.5  |
| 700                                           | 2.8  | 4.91 | 10.06 | 15.77 |

**Table S2** The photocurrent density of CBOS PEC photodetectors for various wavelengths of light with different power intensities under 0V

| <div> <div>I(<math>\mu\text{A}/\text{cm}^2</math>)</div> <div>Light(nm)</div> </div> | I     | II    | III   | IV   |
|--------------------------------------------------------------------------------------|-------|-------|-------|------|
| 365                                                                                  | 0.724 | 1.384 | 1.992 | 3.62 |
| 400                                                                                  | 0.48  | 0.92  | 1.64  | 2.28 |
| 500                                                                                  | 0.36  | 0.44  | 0.88  | 1.08 |
| 600                                                                                  | 0.32  | 0.56  | 0.80  | 1.32 |
| 700                                                                                  | 0.24  | 0.28  | 0.56  | 0.64 |

**Table S3** The responsivity of CBOS PEC photodetectors for various wavelengths of light with different power intensities under 0V

| $\begin{matrix} R(\text{mA/W}) \\ \text{Light}(\text{nm}) \end{matrix}$ | I     | II    | III   | IV    |
|-------------------------------------------------------------------------|-------|-------|-------|-------|
| 365                                                                     | 0.55  | 0.408 | 0.344 | 0.338 |
| 400                                                                     | 0.310 | 0.200 | 0.300 | 0.260 |
| 500                                                                     | 0.098 | 0.087 | 0.081 | 0.077 |
| 600                                                                     | 0.100 | 0.095 | 0.093 | 0.091 |
| 700                                                                     | 0.086 | 0.057 | 0.055 | 0.046 |

**Table S4** The photocurrent density of CBOS PEC photodetectors under 365nm light illumination with different power intensities and different bias voltages

| $I(\mu\text{A}/\text{cm}^2)$<br>Bias(V) | I      | II     | III    | IV     |
|-----------------------------------------|--------|--------|--------|--------|
| 0                                       | 0.724  | 1.384  | 1.992  | 3.62   |
| 0.2                                     | 1.198  | 2.061  | 3.328  | 6.100  |
| 0.4                                     | 2.892  | 3.604  | 6.008  | 10.296 |
| 0.6                                     | 14.008 | 16.832 | 19.744 | 28.456 |

**Table S5** The responsivity of CBOS PEC photodetectors under 365nm light illumination with different power intensities and different bias voltages

| $\begin{matrix} R(\text{mA/W}) \\ \text{Bias(V)} \end{matrix}$ | I      | II    | III   | IV    |
|----------------------------------------------------------------|--------|-------|-------|-------|
| 0                                                              | 0.55   | 0.408 | 0.344 | 0.338 |
| 0.2                                                            | 0.92   | 0.61  | 0.344 | 0.57  |
| 0.4                                                            | 2.23   | 1.06  | 1.03  | 0.964 |
| 0.6                                                            | 10.778 | 4.97  | 3.42  | 2.66  |

**Table S6** Comparison of Photoelectric Properties in Hydrothermally Synthesized 2D Materials

|                                   | R(mA/W) | Raise/decay(s) | Refs.     |
|-----------------------------------|---------|----------------|-----------|
| CBOS                              | 10.78   | 0.06/0.06      | This work |
| SnS <sub>2</sub>                  | 1.46    | 0.32/1.15      | (1)       |
| SnSe                              | 0.00005 | 0.17/0.51      | (2)       |
| Bi <sub>2</sub> O <sub>2</sub> Se | 0.02    | 0.2/0.12       | (3)       |
| CuO                               | 2.7     | 0.06/0.4       | (4)       |
| ZnO/MoS <sub>2</sub>              | 4       | 0.15/0.17      | (5)       |
| Te/Se                             | 0.083   | 0.14/0.47      | (6)       |



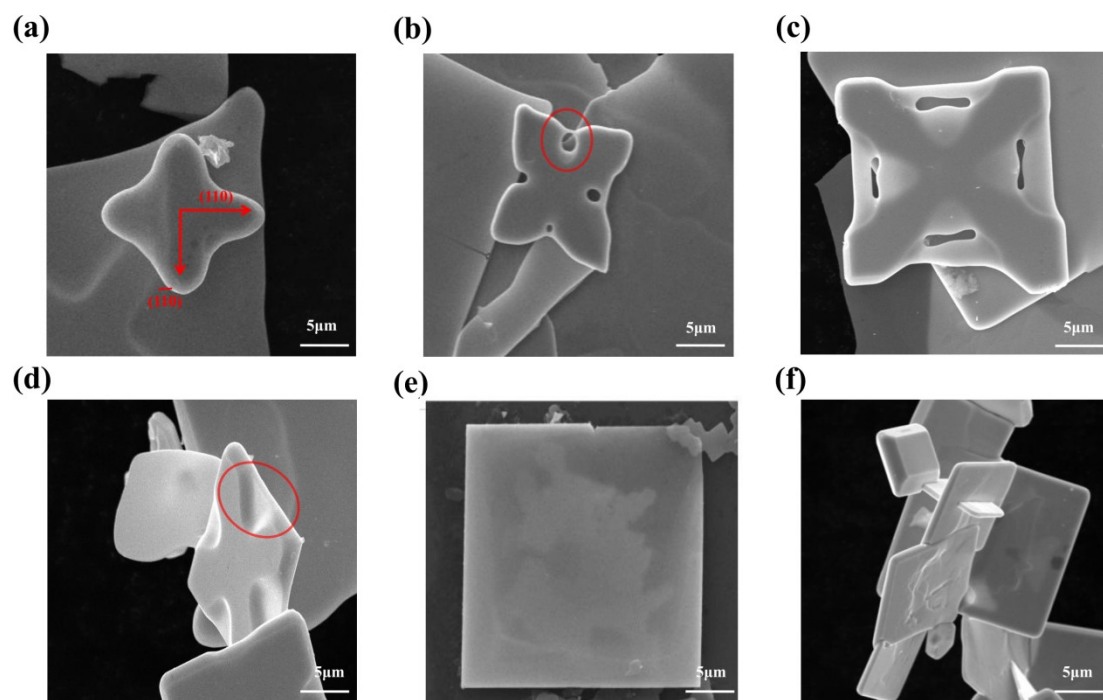

**Figure S1 SEM image** (a-f) present the formation process of Cu-doped  $\text{Bi}_2\text{O}_2\text{Se}$  square nanosheets.

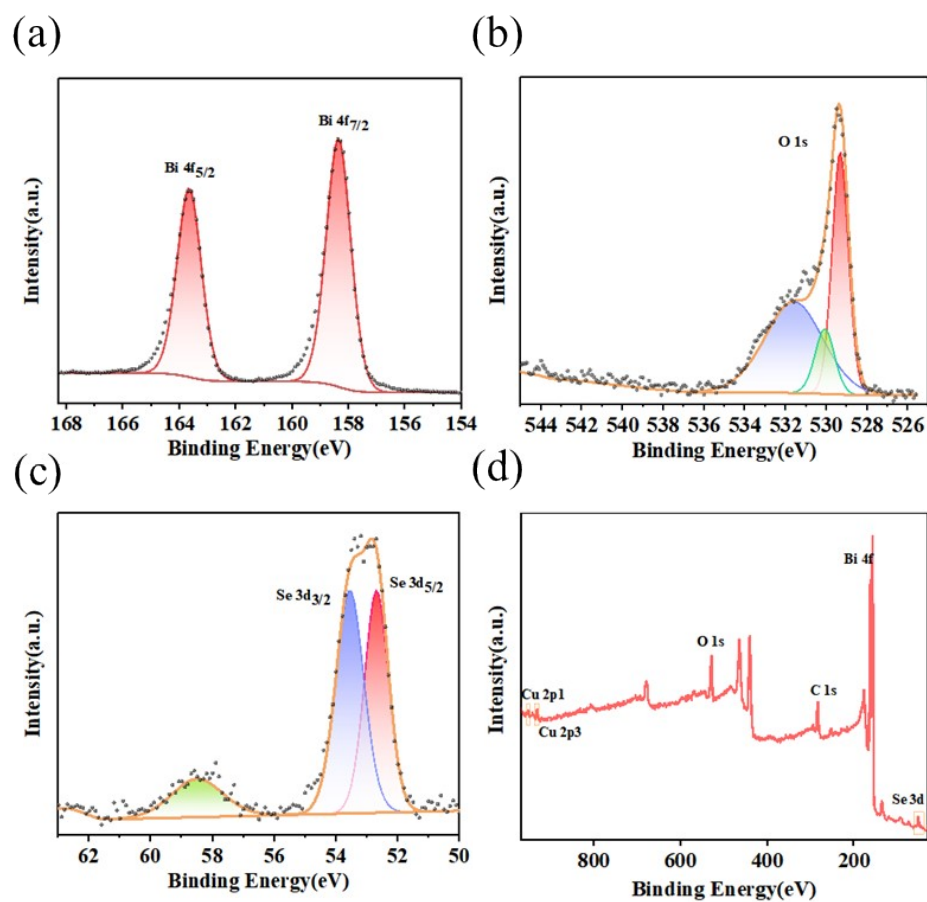

**Figure S2 XPS spectra.** (a) present the full-scale XPS scan of the 2D CBOS nanosheets. (b-c) present XPS spectra of Cu, Bi, O, and Se, respectively.

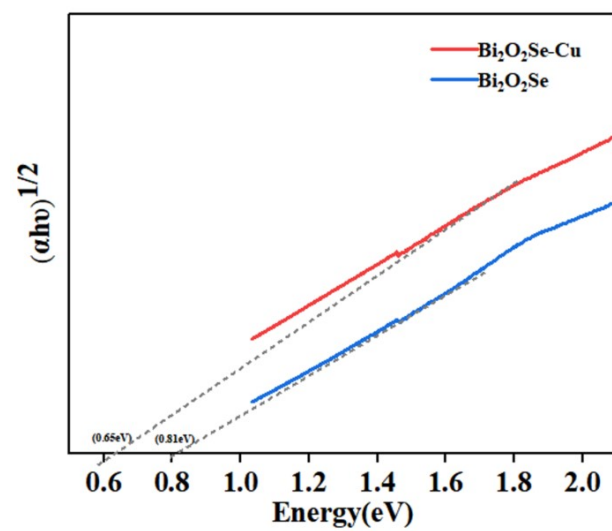

Figure S3 Comparative plot of Tauc curves for  $\text{Bi}_2\text{O}_2\text{Se}$  and Cu-doping  $\text{Bi}_2\text{O}_2\text{Se}$ .

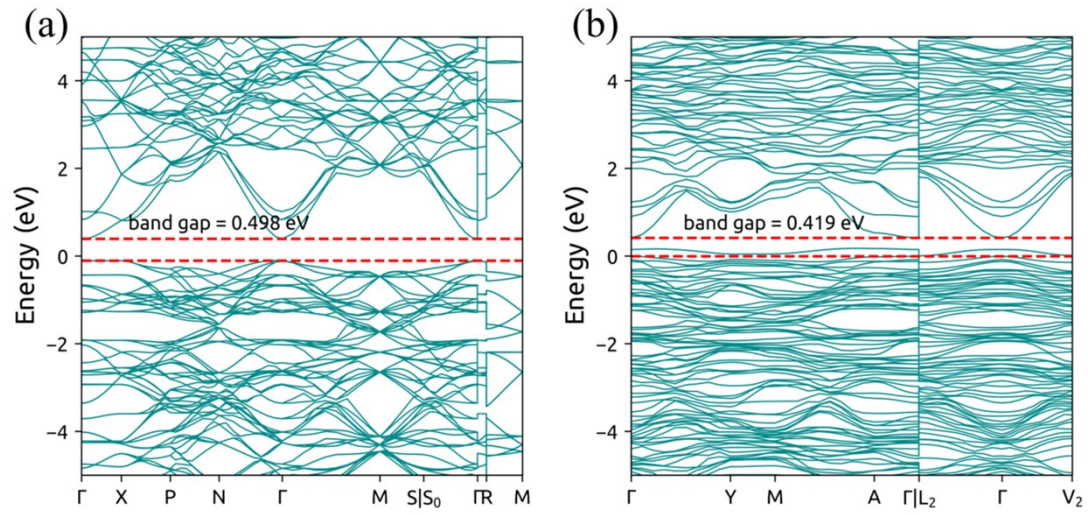

**Figure S4. DFT-calculated band structures of  $\text{Bi}_2\text{O}_2\text{Se}$  before and after Cu doping. (a)**

Intrinsic  $\text{Bi}_2\text{O}_2\text{Se}$  with a band gap of 0.498 eV. (b) Cu-doped  $\text{Bi}_2\text{O}_2\text{Se}$  (CBOS) with a narrowed band gap of 0.419 eV, showing a marked upward shift of the valence band maximum.

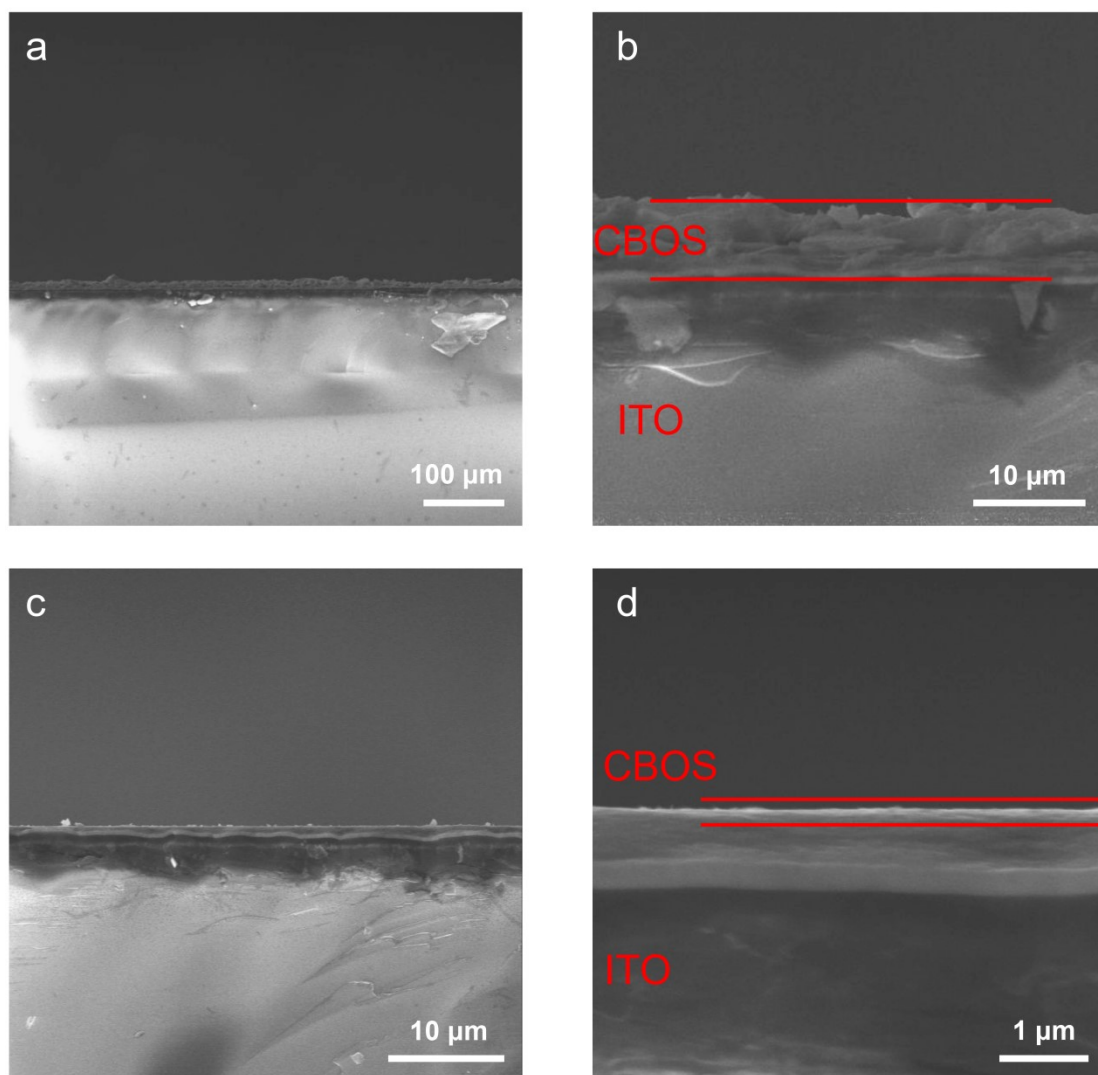

**Figure S5. Cross-sectional SEM characterization of CBOS films on ITO substrates prepared from solutions with different concentrations.** (a, b) Low-magnification (a) and high-magnification (b) cross-sectional views of a high-concentration CBOS film. The red outlines highlight the uniformly coated CBOS layer. (c, d) Low-magnification (c) and high-magnification (d) cross-sectional views of a low-concentration CBOS film.

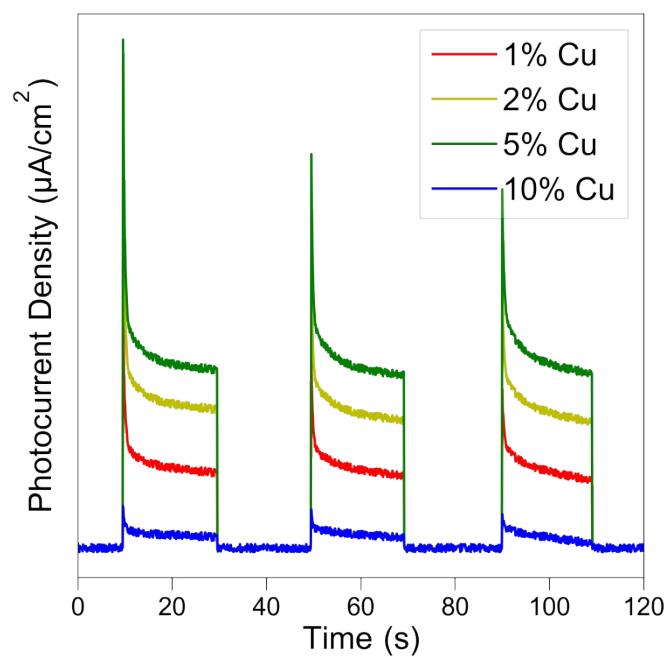

**Figure S6. Photocurrent density versus time curves for samples with different feeding Cu/Bi ratios**

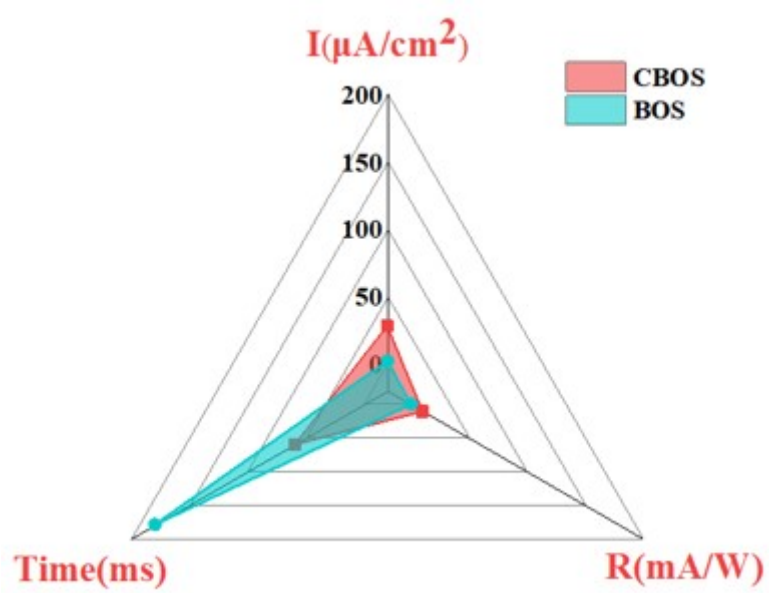

Figure S7 Performance Comparison Chart of BOS and CBOS

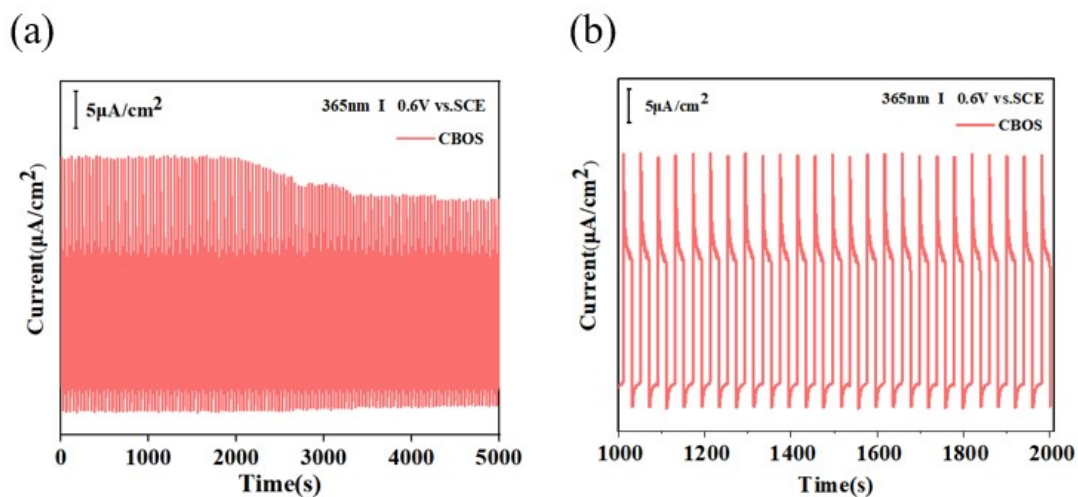

**Figure S8 Stability of the 2D CBOS photodetector.** (a) Long-term stability tests of the 2D CBOS PEC photodetector for 5000 s illuminated by 365nm (level I) at 0V. (b) 25 cycles intercepted from 1000-2000s



## Reference

- (1) Deng, S., Chen, Y., Li, Q., Sun, J., Lei, Z., Hu, P., ... & Ma, R. Direct growth of SnS<sub>2</sub> nanowall photoanode for high responsivity self-powered photodetectors. *Nanoscale* **2022**, 14(38), 14097-14105.
- (2) Liang, Z., Hao, R., Luo, H., He, Z., Su, L., & Fan, X. Enhancing the photo-response performance of a SnSe-based photoelectrochemical photodetector via Ga doping. *Journal of Materials Chemistry C* **2024**, 12(8), 2981-2992.
- (3) Chen, G., Wu, J., Wang, B., Li, J., & Qi, X. High-performance self-powered photodetector based on Bi<sub>2</sub>O<sub>2</sub>Se nanosheets. *Applied Physics A* **2020**, 126(7), 579.
- (4) Gao, Q., Jin, Z., Qu, L., Shao, Z., Liu, X., Zhang, Y., ... & Feng, W. CuO nanosheets for use in photoelectrochemical photodetectors. *ACS Applied Nano Materials* **2022**, 6(1), 784-791.
- (5) Ma, J., Ge, Y., Dai, P., Lu, C., & Xu, X. Highly stable and sensitive photoelectrochemical photodetectors based on a ZnO nanorod/monolayer MoS<sub>2</sub> nanosheets heterostructure. *Journal of Alloys and Compounds* **2024**, 976, 173315.
- (6) Wang, Y., Zhao, F., Wang, Y., Zhang, Y., Shen, Y., Feng, Y., & Feng, W. Broadband self-powered photoelectrochemical photodetector based on Te/Se heterostructure nanocomposites. *Composites Communications* **2022**, 32, 101175.
